# Supplementary material for: NK-Cell-Mediated Targeting of Various Solid Tumors Using a B7-H3 Tri-Specific Killer Engager In Vitro and In Vivo
Source: Cancers (Basel). 2020 Sep 18;12(9):2659. doi: 10.3390/cancers12092659 (PMC7564091; doi:10.3390/cancers12092659)

# NK-Cell-Mediated Targeting of Various Solid Tumors Using a B7-H3 Tri-Specific Killer Engager In Vitro and In Vivo

Daniel A. Vallera, Soldano Ferrone, Behiye Kodali, Peter Hinderlie, Laura Bendzick, Brianna Ettestad, Caroline Hallstrom, Nicholas A. Zorko, Arpit Rao, Naomi Fujioka, Charles J. Ryan, Melissa A. Geller, Jeffrey S. Miller, and Martin Felices

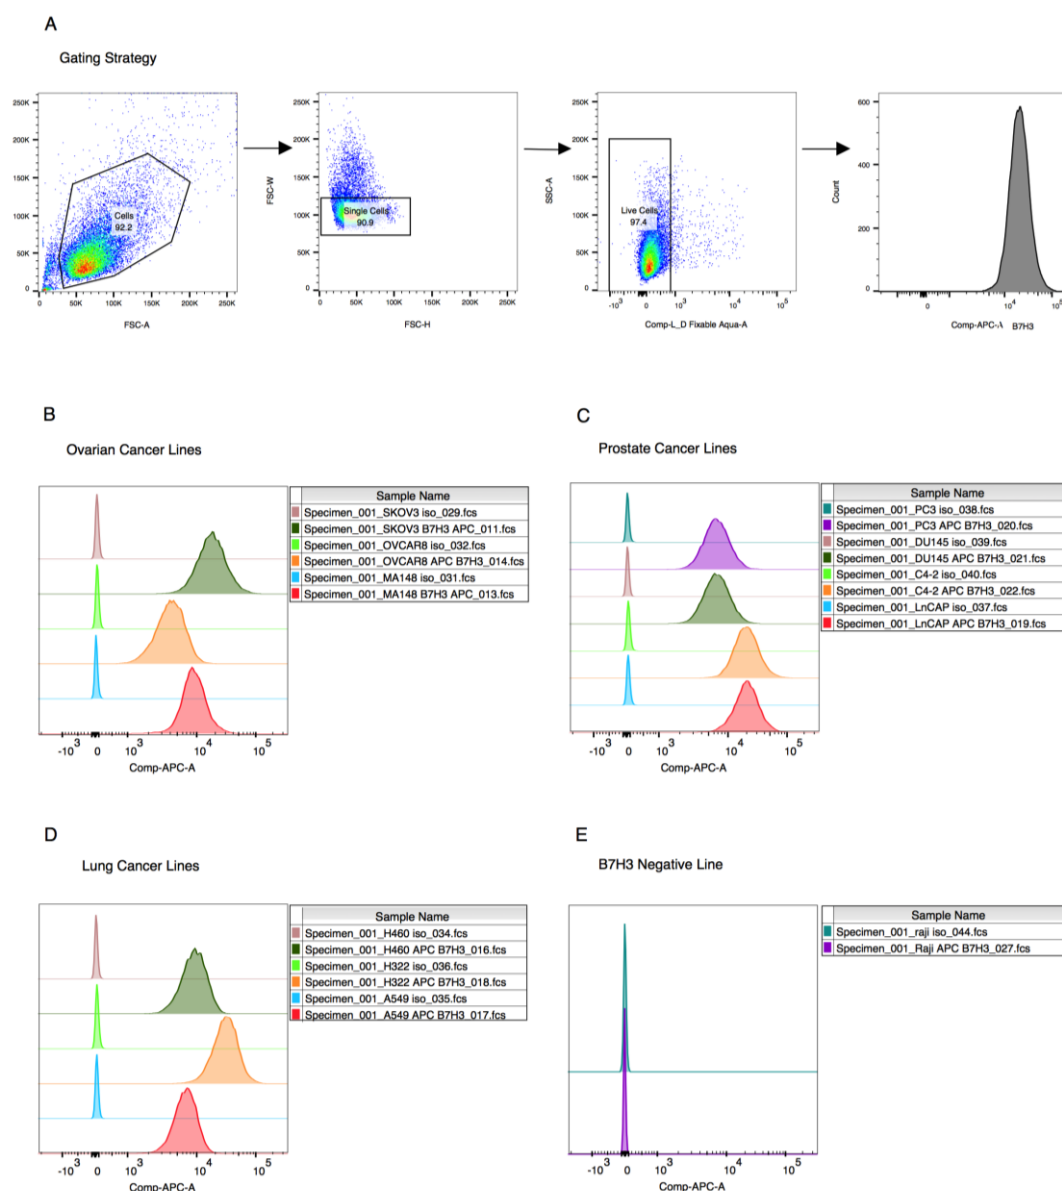

**Figure 1.** To evaluate expression of B7-H3 on a broad spectrum of cancer cell lines, an APC labeled anti-B7-H3 antibody (clone 7-517, Invitrogen) was used. (A) Gating strategy for flow cytometric evaluation of B7-H3 on tumor cell lines. B7-H3 expression on (B) ovarian cancer cells, (C) prostate cancer cells, (D) lung cancer cells, and (E) lymphoma cells (as a negative control).

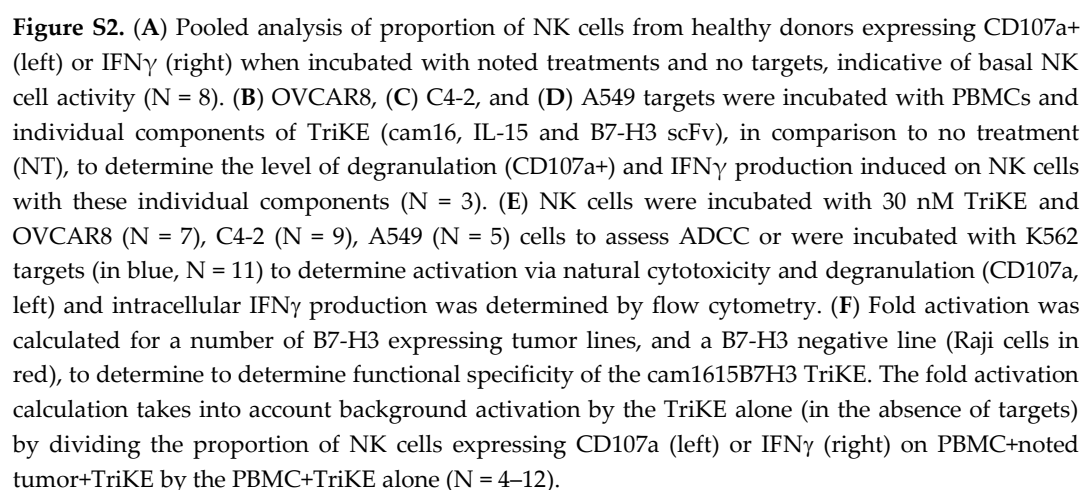

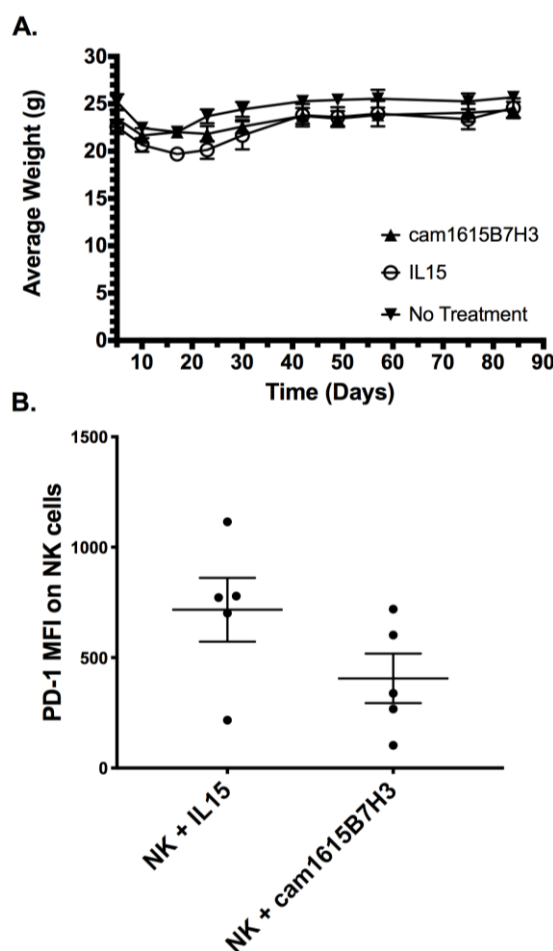

**Figure S3.** (A) NSG mice were irradiated (180 cGy), to enhance NK cell engraftment, and injected with 1 million NK cells 3 days later. Mice were then either left untreated, or treated with 5 ug/injection IL15 (3 days a week; MWF), or 30 ug/injection cam1615B7H3 (5 days a week; MTWThF) for three weeks. To elucidate toxicity, weights were tracked over the course of 90 days, starting at the time of treatment (N = 5). (B) Xenogeneic ovarian cancer MA-148-Luc model was carried out with injected NK cells and noted treatments. 21 days after initial treatment mice were harvested and peritoneal lavages were carried out to evaluate PD-1 expression on CD56+CD3<sup>-</sup> NK cells by flow cytometry. Scatter plots shown displaying PD-1 median fluorescence intensity on NK cells.

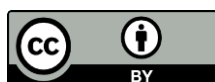

Supplement: Supplementary file 1 [file cancers-12-02659-s001.pdf]
